# Supplementary material for: A technetium intermediate specifically promotes deprotection of trifluoroacetyl HYNIC during radiolabelling under mild conditions
Source: Royal Society of Chemistry journal article supplement (doi:10.1039/b805110k), 2008-01-01
Supplement: b805110k.pdf [file b805110k.pdf]

## A technetium intermediate specifically promotes deprotection of trifluoroacetyl HYNIC during radiolabelling under mild conditions

M. Bashir-Uddin Surfraz<sup>a</sup>, Stefano C. G. Biagini<sup>\*b</sup> and Philip J. Blower<sup>\*c</sup>

Electronic Supplementary Information

### 1. Oligomerisation of HYNIC active ester – experimental and LCMS data

(a) Experimental: To a solution of HYNIC in DMSO (15 mg in 1 ml, 98  $\mu\text{mol}$ ) was added dicyclohexylcarbodiimide (DCC, 1 eq.). After stirring for 5 min, N-hydroxysuccinimide (NHS, 1 eq.) was added. The resulting solution was left stirring at room temperature for 3 hours. A 20  $\mu\text{l}$  aliquot of the reaction mixture was sampled and diluted with 380  $\mu\text{l}$  of a mixture of DMSO/water (1:1; v/v). 100  $\mu\text{l}$  of the resulting solution was injected for analysis by RP LC-MS using the following HPLC Method: mobile phase: linear gradient of increasing acetonitrile (ACN) in 0.05% aqueous TFA: 0-10 min 5% ACN, 5-40 min 10%-90% ACN, 40-45 min 90%-100% ACN, 40-45 min 100%-5% ACN; flow rate: 0.2 ml/min; detection: UV absorbance at 214 nm and 254 nm).

(b) Selected LCMS data up to  $m/z = 1000$  showing formation and oligomerisation of **4**. Other peaks were observed corresponding to HYNIC oligomers incorporating dicyclohexylcarbodiimide adducts and N-hydroxysuccinimide ring opening reactions.

| M+ ion m/z | Calc (M+H) <sup>+</sup> | Solution species | Elution time/min |  |
|------------|-------------------------|------------------|------------------|--|
| 251.1      | 251                     | 4                | 14-19            |  |
| 386.1      | 386                     | 13, n = 1        | 15               |  |
| 521.1      | 521                     | 13, n = 2        | 15               |  |
| 656.0      | 656                     | 13, n = 3        | 15               |  |
| 791.1      | 791                     | 13, n = 4        | 15               |  |
| 926.1      | 926                     | 13, n = 5        | 15               |  |
| 694.7      | 694                     | 14, n = 4        | 16-17            |  |
| 829.7      | 829                     | 14, n = 5        | 16-17            |  |
|            |                         |                  |                  |  |

## 2. ESMS of products of labelling of 7 and 9 with Tc/tricine

In a screw top 2.5 ml polypropylene Corning vial, 3 µg of HYNIC compound in water was incubated with 0.5 ml of a solution of *tris*(hydroxymethyl)methylglycine (tricine; 100 mg/ml in water), 0.5 ml of  $^{99m}\text{TcO}_4^-$  solution (>200 MBq), and 10 µl of stannous chloride dihydrate solution (3 mg/ml in ethanol) for 30 min at 97°C or 15 min at 20°C. To meet MS requirements, the labeling experiment was scaled up as follows: In a screw top 2.5 ml polypropylene corning vial, 14 µg of HYNIC compound in water was incubated with 100 µl of a solution of tricine (100mg/350 µl in water), 50 µl  $^{99}\text{TcO}_4^-$  solution ( $1 \times 10^{-8}$  moles), 5 µl  $^{99m}\text{TcO}_4^-$  solution (3 MBq), and 5 µl stannous chloride dihydrate solution (6 mg/ml in ethanol) for 30 min at 97°C or 15 min at 20°C.

LCMS methods as above.

| HYNIC derivative | <i>m/z</i> (intensity) and elution times |                                |                               |                               |                                |
|------------------|------------------------------------------|--------------------------------|-------------------------------|-------------------------------|--------------------------------|
|                  | Method A (ES-)                           | Method B (ES+)                 |                               | Method C (ES+)                |                                |
|                  | 1 tricine Tc-complex                     | 1 tricine Tc-complex           | 2 tricines Tc-complex         | 1 tricine Tc-complex          | 2 tricines Tc-complex          |
| 7                | -                                        | 776.0 (100%)<br>30.4, 30.7 min | 955.0 (60%)<br>29.3, 29.6 min | 776.0 (10%)<br>30.4, 30.7 min | 955.0 (100%)<br>29.3, 29.6 min |
| 9                | -                                        | 776.0 (100%)<br>30.4, 30.7 min | 955.0 (60%)<br>29.3, 29.6 min | 776.0 (10%)<br>30.4, 30.7 min | 955.0 (100%)<br>29.3, 29.6 min |

Similar results were obtained at 97°C and at room temperature.

*Method A*: Peptide analytical mode, negative mode ionization with tube lens offset (skimmer) and capillary voltage set at -50 V and -16 V respectively; *Method B*: Peptide analytical mode, positive mode ionization with tube lens offset (skimmer) and capillary voltage set at +30 V and +19 V respectively; *Method C*: organic analytical profile mode, positive mode ionization with tube lens offset (skimmer) and capillary voltage set at 0 V and +15 V respectively;

### **3. Reaction of Fmoc-(trifluoroacetylHYNIC)-lysine 9 with stannous chloride, pertechnetate, and tricine; experimental methods and LCMS data**

(a) Experimental:

Sodium pertechnetate challenge: To an aqueous solution of sodium pertechnetate [200 µl of a 0.03 M solution, pH 5.0] was added a 0.05 M solution of Fmoc-(trifluoroacetylHYNIC)-lysine 9 in DMSO (50 µl, 2.5 µmol) and the resulting solution was stirred at 20 °C for 2 h. A 40 µl aliquot of the reaction mixture was sampled and diluted with 360 µl of a mixture of DMSO/water (1:1; v/v). 25 µl of the resulting solution was injected for analysis by RP LC-MS, using Method 2.

Tricine challenge: To an aqueous solution of tricine [250 µl of a 0.19 M solution, pH 4.5] was added a 0.05 M solution of Fmoc-(trifluoroacetylHYNIC)-lysine 9 in DMSO (20 µl, 1 µmol) and the resulting solution was stirred at 20 °C for 2 h. A 20 µl aliquot of the reaction mixture was sampled and diluted with 380 µl of a mixture of DMSO/water (1:1; v/v). 25 µl of the resulting solution was injected for analysis by RP LC-MS, using Method 1.

Stannous chloride challenge 1: To an aqueous solution of stannous chloride [30 µl of a 0.1 M solution (pH 2), added to 100 µl of phosphate buffer (pH 8), overall pH 7.0] was added a 0.05 M solution of Fmoc-(trifluoroacetylHYNIC)-lysine 9 in DMSO (20 µl, 2.5 µmol) and the resulting solution was stirred at 20 °C for 2 h. A 20 µl aliquot of the reaction mixture was sampled and diluted with 480 µl of a mixture of DMSO/water (1:1; v/v). 50 µl of the resulting solution was injected for analysis by RP LC-MS, using Method 1.

Stannous chloride challenge 2: To an aqueous solution of stannous chloride [30 µl of a 0.1 M solution (pH 2), added to 100 µl of water] was added 30 µl of a 1.6 M solution of tricine. The resulting solution was titrated with drops of an aqueous solution of 0.1 M NaOH until pH 6. Then a 0.05 M solution of Fmoc-(trifluoroacetylHYNIC)-lysine 9 in DMSO (20 µl, 2.5 µmol) was added and the resulting solution was stirred at 20 °C for 2 h. A 20 µl aliquot of the reaction mixture was sampled and diluted with 480 µl of a mixture of DMSO/water (1:1; v/v). 50 µl of the resulting solution was injected for analysis by RP LC-MS, using Method 1. This procedure was then repeated using stannic chloride instead of stannous chloride.

“Labelling” of Fmoc-(trifluoroacetylHYNIC)-lysine 9 with <sup>99</sup>Tc

To a 3 mM aqueous solution of sodium pertechnetate (84  $\mu$ l, 0.25  $\mu$ mol) was added 15  $\mu$ l of stannous chloride dihydrate solution (6 mg/ml in ethanol) followed by 40  $\mu$ l of a solution of tricine (100mg/350  $\mu$ l in water). The solution obtained was incubated at 20 °C for 15 min then titrated with drops of a 0.1 M solution of NaOH till pH 5.5 before addition of a 0.05 M solution of Fmoc-(trifluoroacetylHYNIC)-lysine **8** in DMSO (50  $\mu$ l, 2.5  $\mu$ mol). The resulting solution was stirred at 20 °C for 15 min. A 60  $\mu$ l aliquot of the reaction mixture was sampled and diluted with 340  $\mu$ l of a mixture of DMSO/water (1:1; v/v). 100  $\mu$ l of the resulting solution was injected for analysis by RP LC-MS, using Method 1. This procedure was then repeated with an increased concentration of sodium pertechnetate (50  $\mu$ l of a 30 mM aqueous solution, 1.5  $\mu$ mol).

LCMS methods: Electrospray ionization mass spectra (ES-MS) were obtained with a Finnigan Mat LCQ ion trap mass spectrometer coupled to a Hewlett-Packard 1100 HPLC system for LCMS. Samples were analyzed by RP HPLC MS (ES+) using either a Phenomenex Polymer PRP-1 column (150 x 2 mm, 5  $\mu$ m), using one of two gradient systems: Method 1: mobile phase: linear gradient of increasing acetonitrile (ACN) in 0.05% aqueous TFA: 0-10 min 5% ACN, 10-35 min 5%-90% ACN, 35-40 min 90%-100% ACN, 40-45 min 100%-5% ACN; flow rate: 0.2 ml/min; detection: UV absorbance at 214 nm and 254 nm; Method 2: mobile phase: linear gradient of increasing acetonitrile (ACN) in 0.05% aqueous TFA: 0-5 min 5% ACN, 5-30 min 5%-90% ACN, 30-40 min 90%-100% ACN, 40-45 min 100%-5% ACN; flow rate: 0.2 ml/min; detection: UV absorbance at 214 nm and 254 nm. ESMS analysis was performed using the following mass spectrometry methods: organic analytical profile, positive mode ionization with tube lens offset (skimmer) and capillary voltage set at 0 V and +15 V respectively

(b) Results

| Number | Reagents                                                                                     | pH  | Reaction time/min | % of 9 remaining | Product                    |
|--------|----------------------------------------------------------------------------------------------|-----|-------------------|------------------|----------------------------|
| 1      | Aqueous sodium pertechnetate                                                                 | 5.0 | 120               | 100              | -                          |
| 2      | Aqueous tricine                                                                              | 4.5 | 120               | 100              | -                          |
| 3      | Stannous chloride in phosphate buffer                                                        | 7.0 | 120               | 100              | -                          |
| 4      | Stannous chloride and tricine in water                                                       | 6.0 | 120               | 100              | -                          |
| 5      | Stannic chloride and tricine in water                                                        | 6.0 | 120               | 100              | -                          |
| 6      | 0.1 eq. sodium pertechnetate, stannous chloride and tricine in water (see LCMS report below) | 5.5 | 15                | ~90              | Tc-complexes <b>15, 16</b> |
| 7      | 0.6 eq. sodium pertechnetate, stannous chloride and tricine in water                         | 5.5 | 15                | ~45              | Tc-complexes <b>15, 16</b> |
|        |                                                                                              |     |                   |                  |                            |
|        |                                                                                              |     |                   |                  |                            |

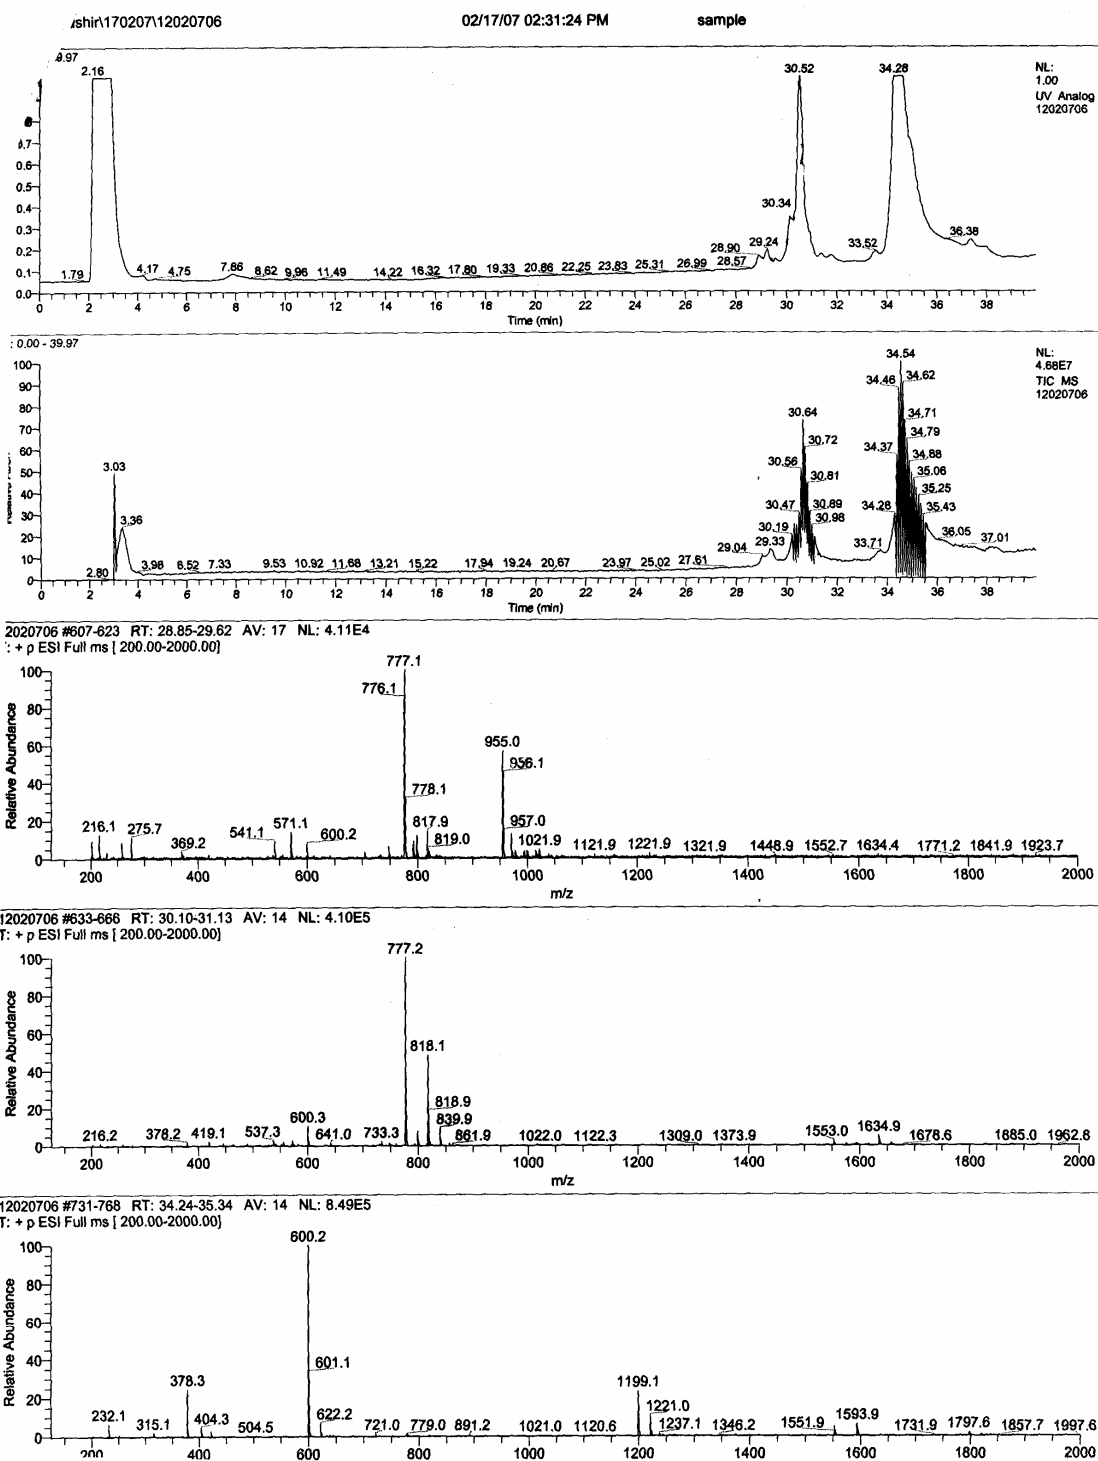

LCMS report for labelling of TFA-protected Fmoc-lysine-HYNIC (**9**) with 0.1 mole equivalents of technetium to give Tc-complexes **15** and **16**.

#### 4. LCMS of peptides Tc-99 labelling of 10 and 12 with tricine as co-ligand

**Method:** In a screw top 2.5 ml polypropylene Corning vial, 10 µl of a solution of a 1 mM solution of nanogastrin-HYNIC peptide (**10** or **12**) in water ( $1.5 \times 10^{-8}$  moles) was incubated with 0.3 ml of a 0.5 M solution of *tris*(hydroxymethyl)methylglycine (tricine;  $1.5 \times 10^{-4}$  moles), 0.1 ml of a 2 mM solution of  $\text{Na}^{99}\text{TcO}_4$  solution ( $2 \times 10^{-8}$  moles), and 10 µl of stannous chloride dihydrate solution (6 mg/ml in ethanol) for 15 min at 20°C or 30 min at 97°C in a water bath. 100 µl of the resulting solution was injected for analysis by RP LC-MS. Electrospray ionization mass spectra (ES-MS) were obtained with a Finnigan Mat LCQ ion trap mass spectrometer coupled to a Hewlett-Packard 1100 HPLC system for LCMS. A Phenomenex Polymer PRP-1 column (150 x 2 mm, 5 µm) was used with the following HPLC method: mobile phase: linear gradient of increasing solvent B (ACN)/water; 70/30% v/v) in 0.05% aqueous TFA: 0-5 min 5% solvent B, 5-35 min 5%-90% solvent B, 35-40 min 90%-100% solvent B, 40-45 min 100%-5% solvent B; flow rate: 0.2 ml/min; detection: UV absorbance at 214 nm and 254 nm); ESMS analysis of technetium complexes was performed using the following mass spectrometry method: organic analytical profile mode, positive mode ionization with tube lens offset (skimmer) and capillary voltage set at 0 V and +15 V respectively.

| Peptide labelled | Main m/z (obs) | Elution time (min)                        | assignment                                            |
|------------------|----------------|-------------------------------------------|-------------------------------------------------------|
| <b>10</b>        | 1553.2         | 25.5 – 28.0 (all peaks give similar ESMS) | $[\text{10}+\text{Tc}+\text{tricine-4H}]^+$           |
|                  | 1575.2         |                                           | $[\text{10}+\text{Tc}+\text{Tricine-5H}+\text{Na}]^+$ |
| <b>12</b>        | 777.3          | 25.5 - 28.0 (all peaks give similar ESMS) | $[\text{10}+\text{Tc}+\text{tricine-3H}]^{2+}$        |
|                  | 1553.2         |                                           | $[\text{10}+\text{Tc}+\text{tricine-4H}]^+$           |
|                  | 1575.3         |                                           | $[\text{10}+\text{Tc}+\text{Tricine-5H}+\text{Na}]^+$ |
|                  |                |                                           |                                                       |
|                  |                |                                           |                                                       |

D:\Users\Bashir\120207\12020712

02/11/07 10:52:35 PM

Gast-TFA

Gast-TFA

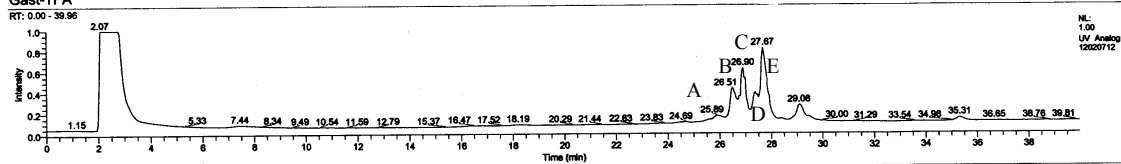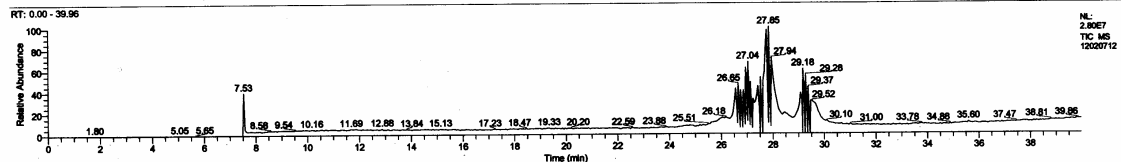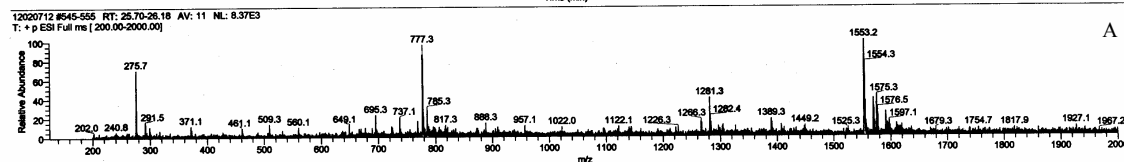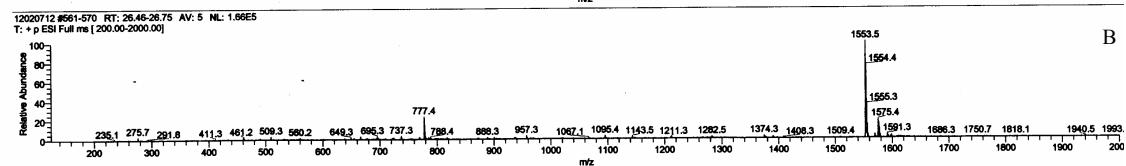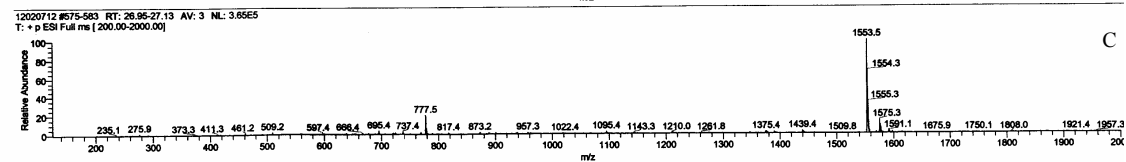

LCMS report for labelling of protected peptide **12** for 30 min at 97°C. Similar results were obtained after 15 min incubation at room temperature. Peaks A, B, C and E contain technetium. Peak E gave the same ESMS as B and C. Peak D is unlabelled peptide.



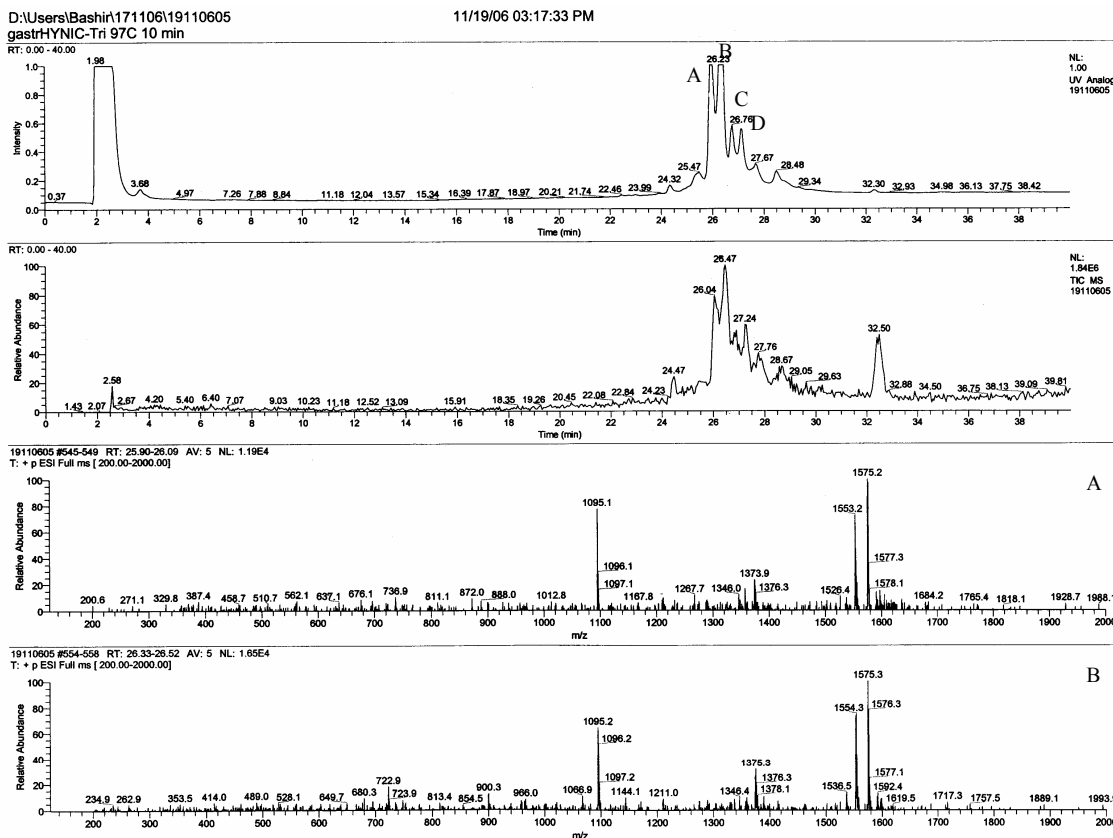

LCMS report for labelling of unprotected peptide **10** for 30 min at 97°C. Similar results were obtained on incubation at room temperature for 15 min. Peaks A and B contain technetium. Peaks C and D gave ESMS with peaks corresponding to unlabelled peptide **10**. Peak C gave  $M^+ - 15$  as the base peak, and peak D gave  $M^+ - (2 \times 15)$  as the base peak. These correspond respectively to loss of NH and 2 x NH from the unprotected HYNIC group during incubation. These peaks are not observed when **12** is labelled.

The peak at 1095.2 in A and B is attributed to a peptide fragment formed during labelling or during ionisation in the mass spectrometer. Such fragment peaks do not occur when protected peptide **12** is treated similarly (see p. 8)
